# Supplementary material for: Synthesis of Schiff Bases Containing Phenol Rings and Investigation of Their Antioxidant Capacity, Anticholinesterase, Butyrylcholinesterase, and Carbonic Anhydrase Inhibition Properties
Source: MDPI journal article supplement (doi:10.3390/pharmaceutics15030779), 2023-02-26
Supplement: s1 [file s1]

## NMR SPECTRUM AND MASS

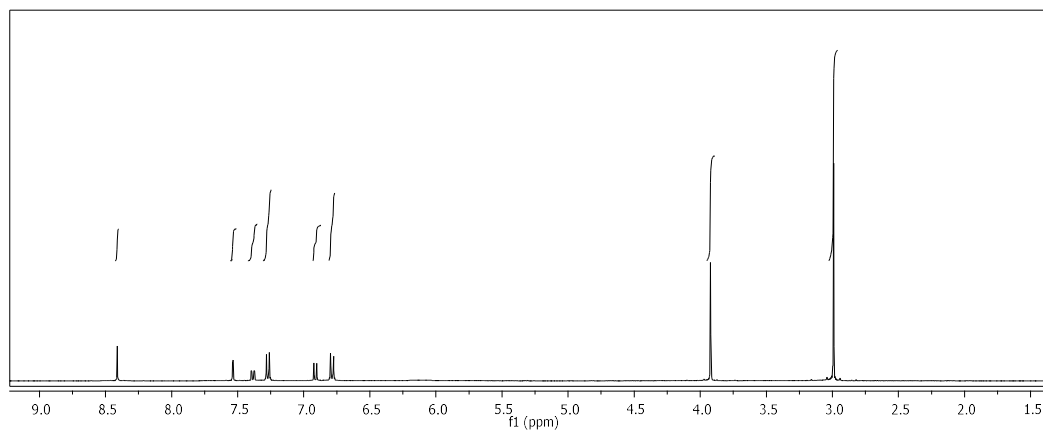

<sup>1</sup>H NMR of (*E*)-5-(((4-(dimethylamino)phenyl)imino)methyl)-2-methoxyphenol (**10**) in CDCl<sub>3</sub>

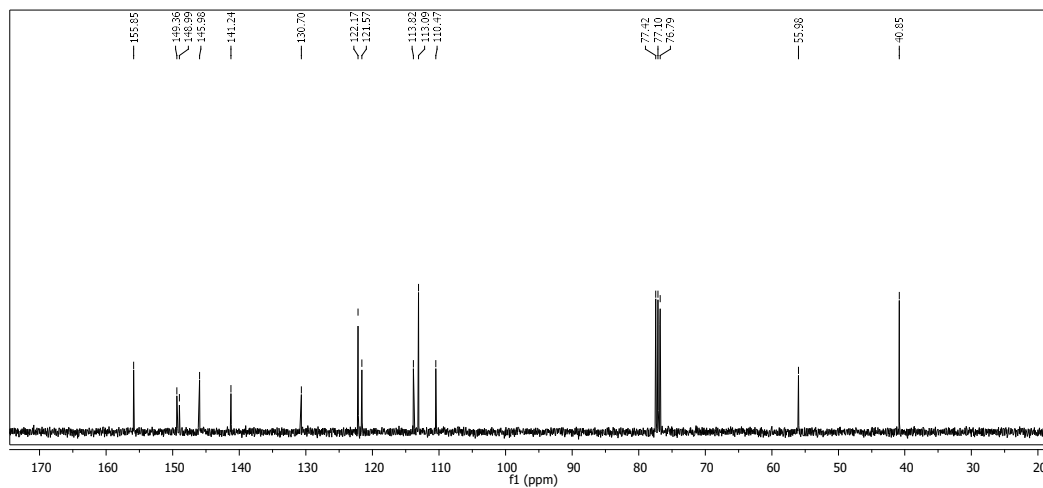

<sup>13</sup>C NMR of (*E*)-5-(((4-(dimethylamino)phenyl)imino)methyl)-2-methoxyphenol (**10**) in CDCl<sub>3</sub>

### User Spectra

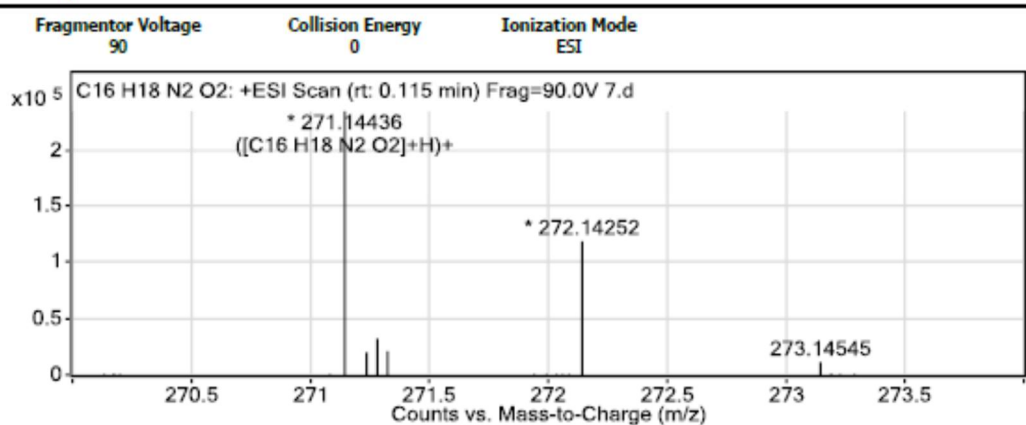

Mass spektrum of (*E*)-5-(((4-(dimethylamino)phenyl)imino)methyl)-2-methoxyphenol (**10**)

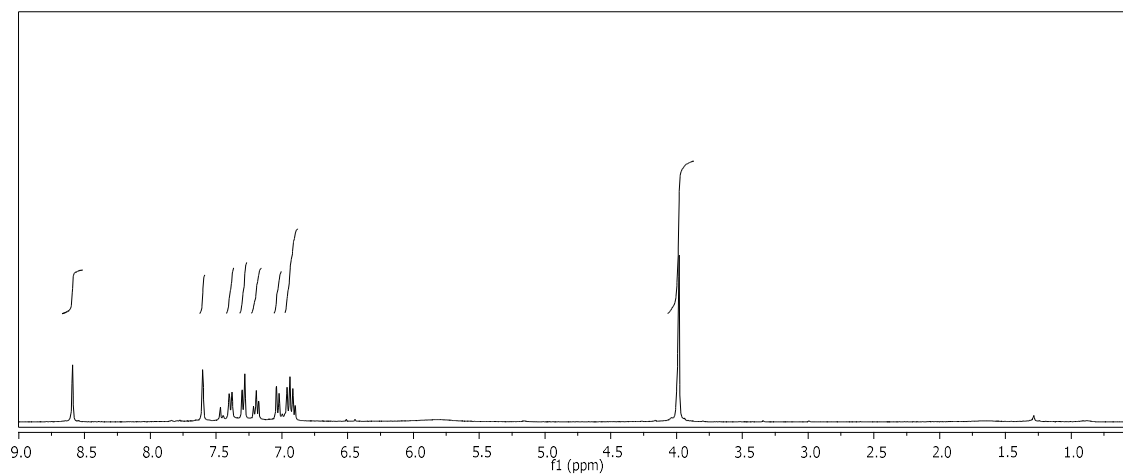

$^1\text{H}$  NMR of (*E*)-5-(((2-hydroxyphenyl)imino)methyl)-2-methoxyphenol (**11**) in  $\text{CDCl}_3$

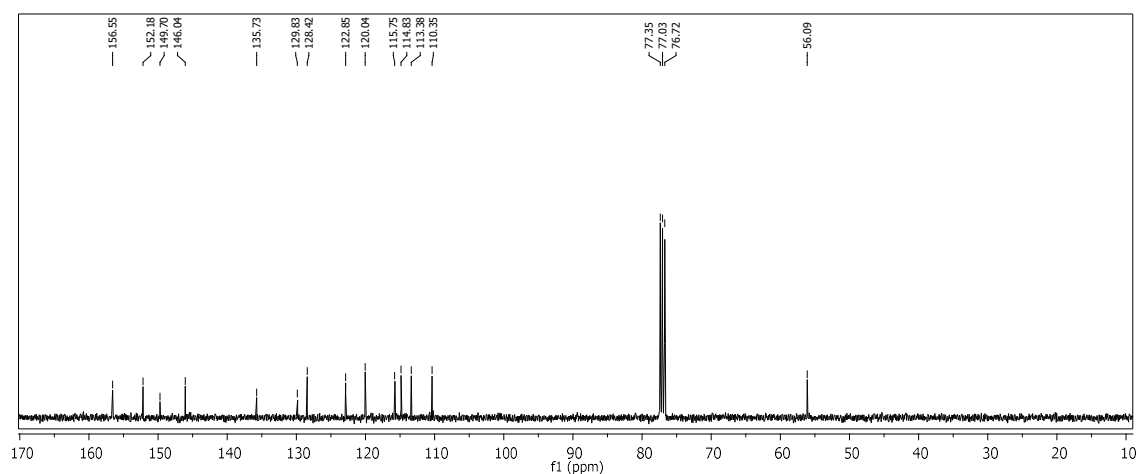

$^{13}\text{C}$  NMR of (*E*)-5-(((2-hydroxyphenyl)imino)methyl)-2-methoxyphenol (**11**) in  $\text{CDCl}_3$

### User Spectra

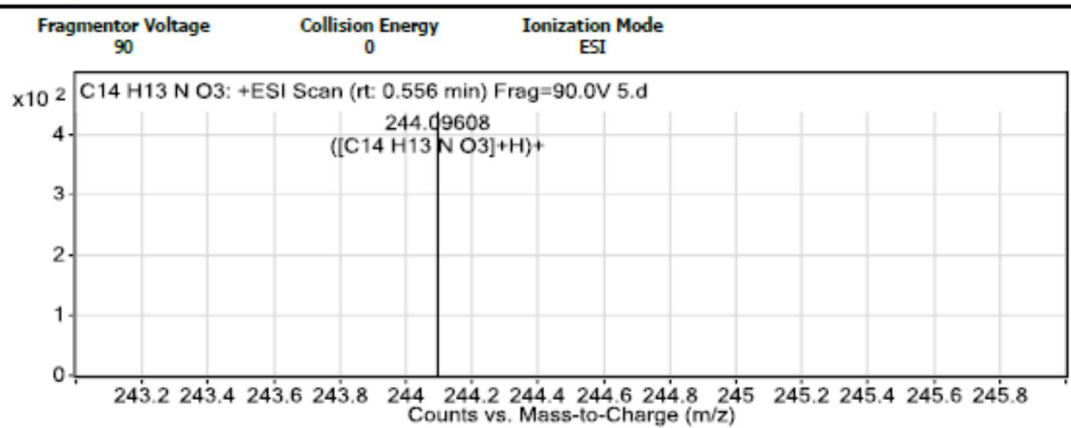

Mass spektrum of (*E*)-5-(((2-hydroxyphenyl)imino)methyl)-2-methoxyphenol (**11**)

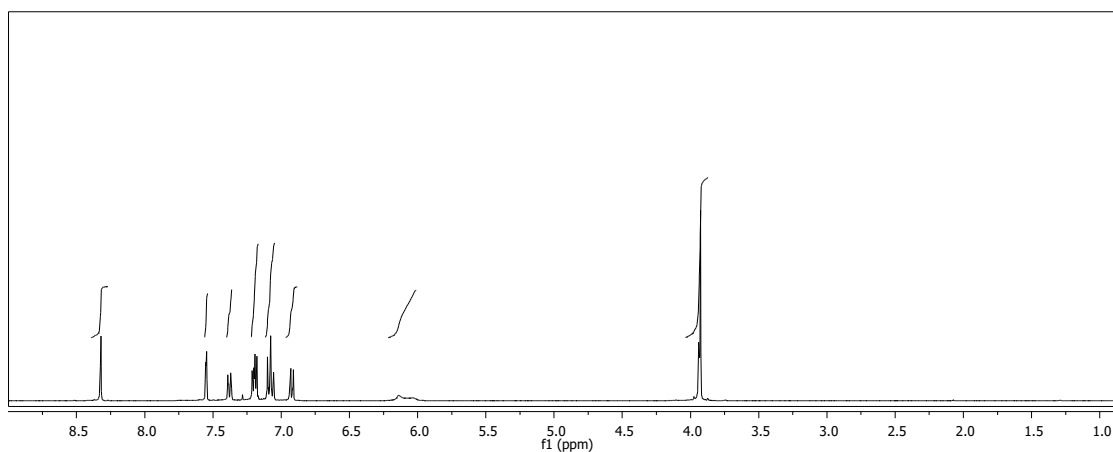

$^1\text{H}$  NMR of (*E*)-5-(((4-fluorophenyl)imino)methyl)-2-methoxyphenol (**12**) in  $\text{CDCl}_3$

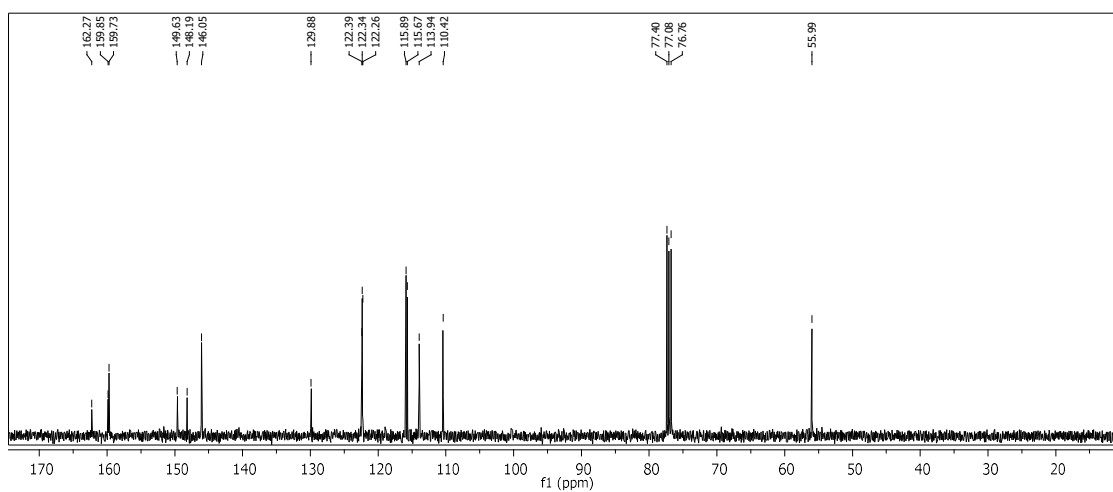

$^{13}\text{C}$  NMR of (*E*)-5-(((4-fluorophenyl)imino)methyl)-2-methoxyphenol (**12**) in  $\text{CDCl}_3$

### User Spectra

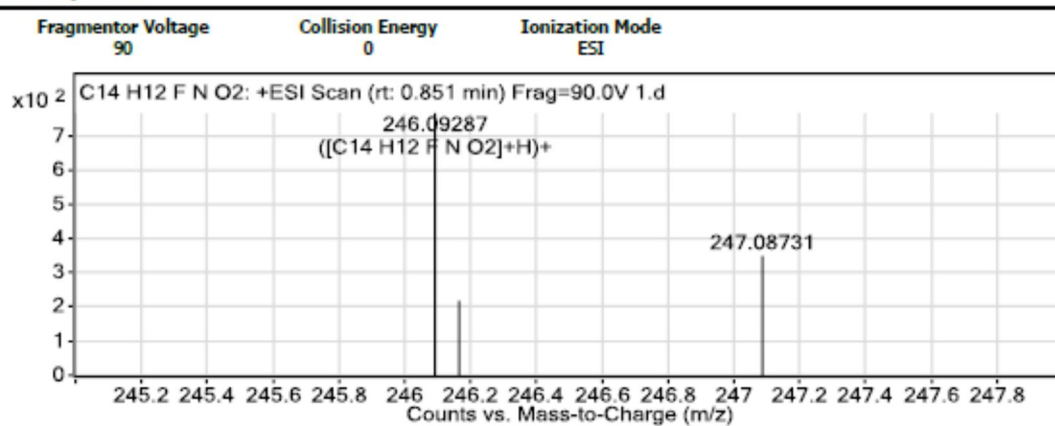

Mass spektrum of (*E*)-5-(((4-fluorophenyl)imino)methyl)-2-methoxyphenol (**12**)

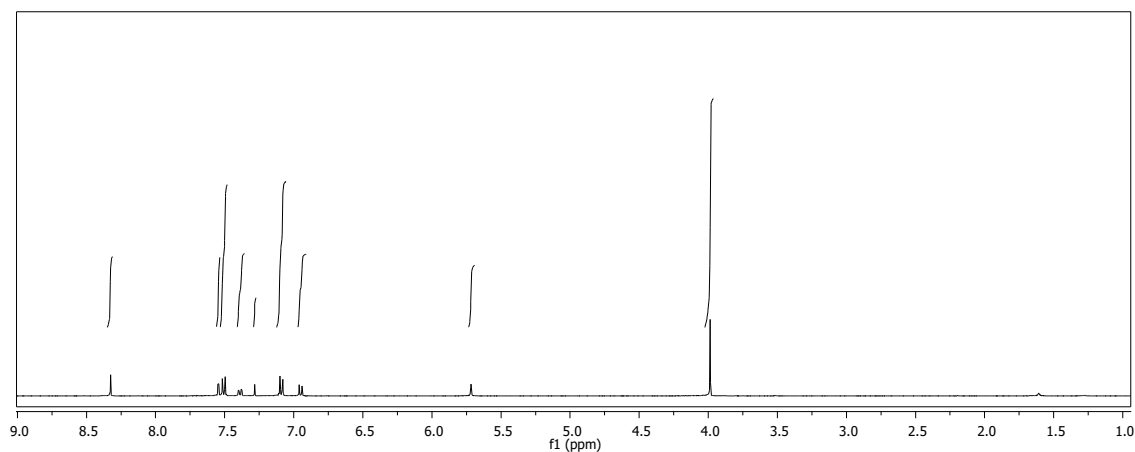

<sup>1</sup>H NMR of (E)-5-(((4-bromophenyl)imino)methyl)-2-methoxyphenol (**13**) in CDCl<sub>3</sub>

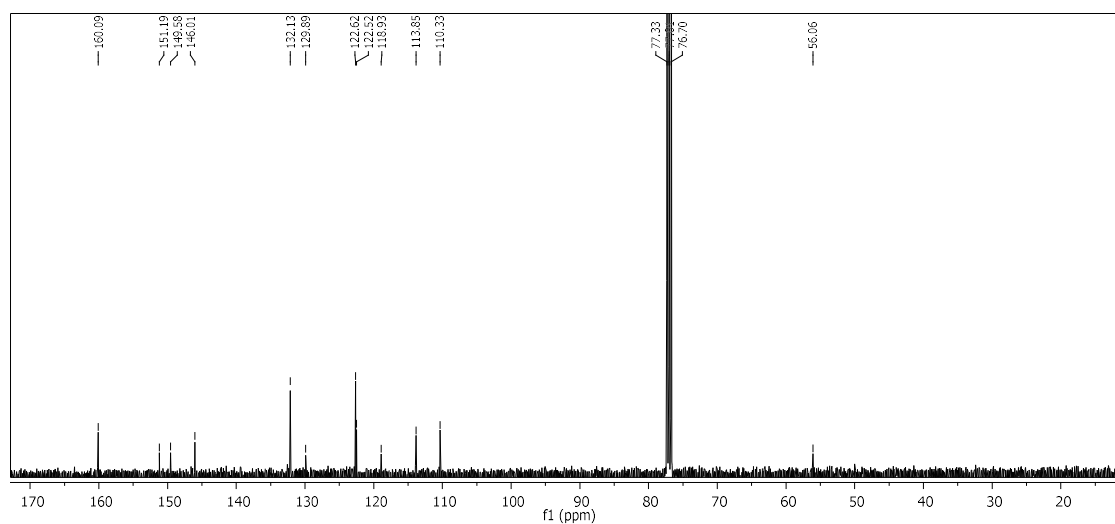

<sup>13</sup>C NMR of (E)-5-(((4-bromophenyl)imino)methyl)-2-methoxyphenol (**13**) in CDCl<sub>3</sub>

## User Spectra

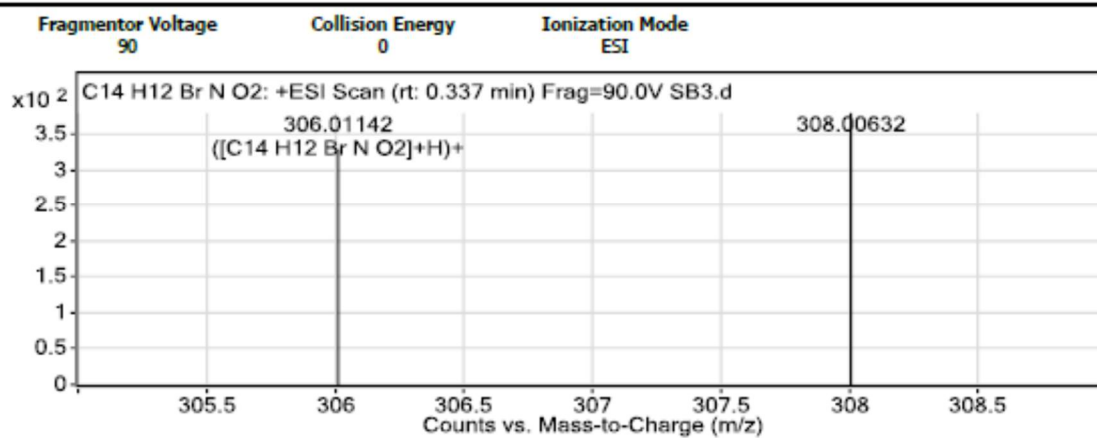

Mass spektrum of (E)-5-(((4-bromophenyl)imino)methyl)-2-methoxyphenol (**13**)

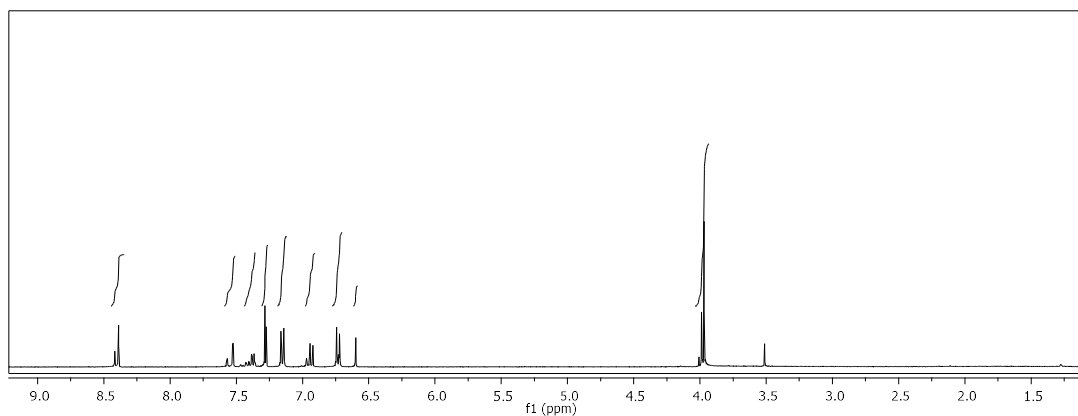

$^1\text{H}$  NMR of (*E/Z*)-5-(((4-aminophenyl)imino)methyl)-2-methoxyphenol (**14**) in  $\text{CDCl}_3$

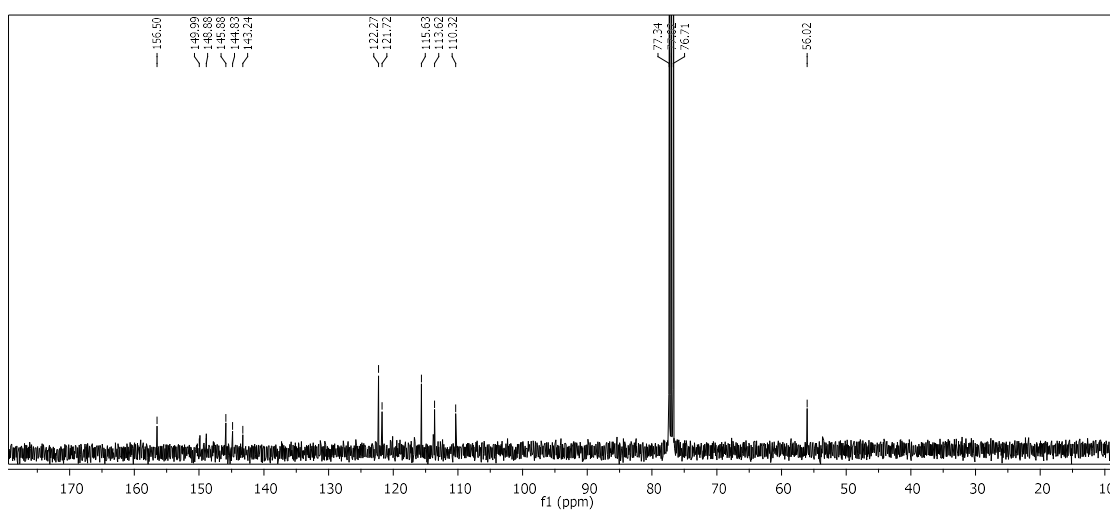

$^{13}\text{C}$  NMR of (*E/Z*)-5-(((4-aminophenyl)imino)methyl)-2-methoxyphenol (**14**) in  $\text{CDCl}_3$

### User Spectra

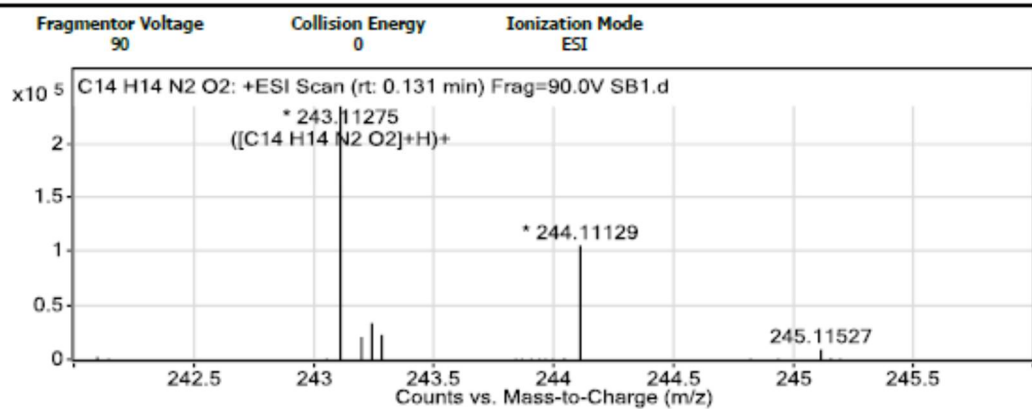

Mass spektrum of (*E/Z*)-5-(((4-aminophenyl)imino)methyl)-2-methoxyphenol (**14**)

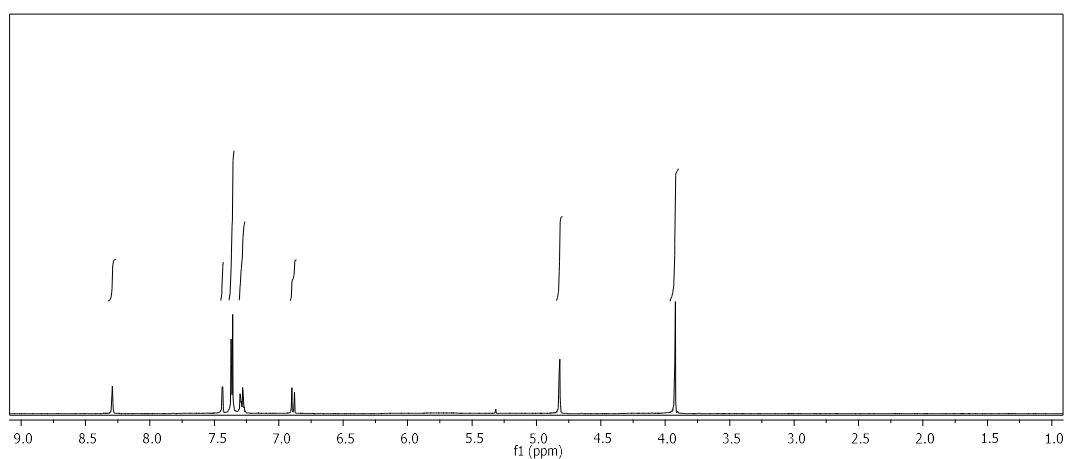

$^1\text{H}$  NMR of 5-((benzylimino)methyl)-2-methoxyphenol (**15**) in  $\text{CDCl}_3$

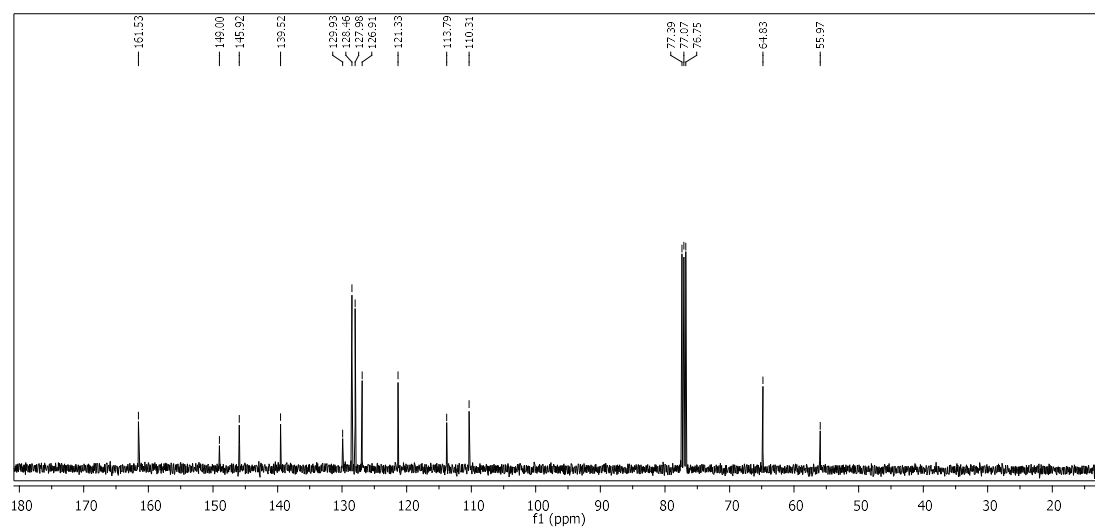

$^{13}\text{C}$  NMR of 5-((benzylimino)methyl)-2-methoxyphenol (**15**) in  $\text{CDCl}_3$

### User Spectra

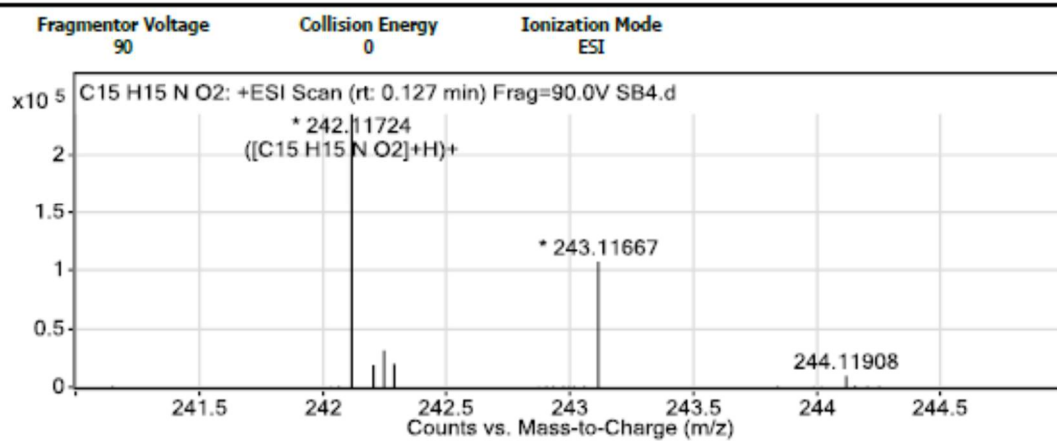

Mass spectrum of 5-((benzylimino)methyl)-2-methoxyphenol (**15**)

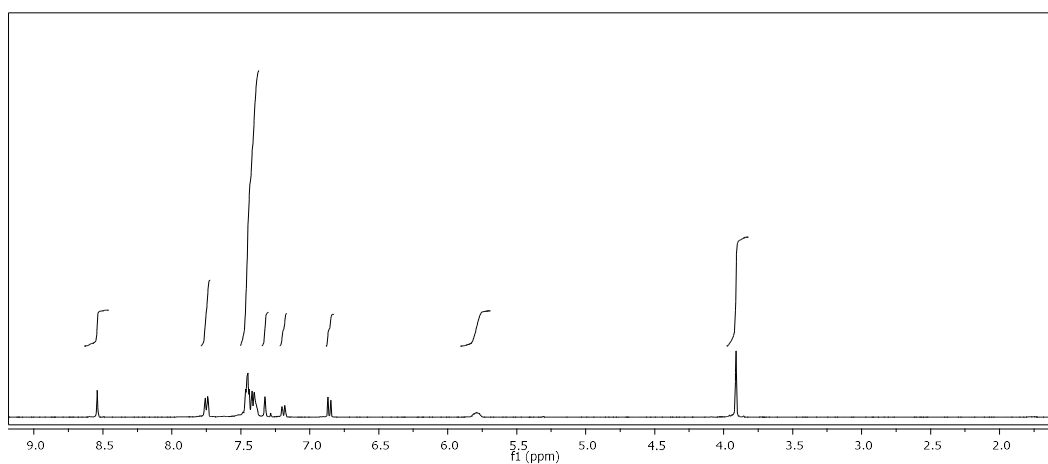

$^1\text{H}$  NMR of (*E*)-5-(((diphenylmethylene)hydrazineylidene)methyl)-2-methoxyphenol (**16**) in  $\text{CDCl}_3$

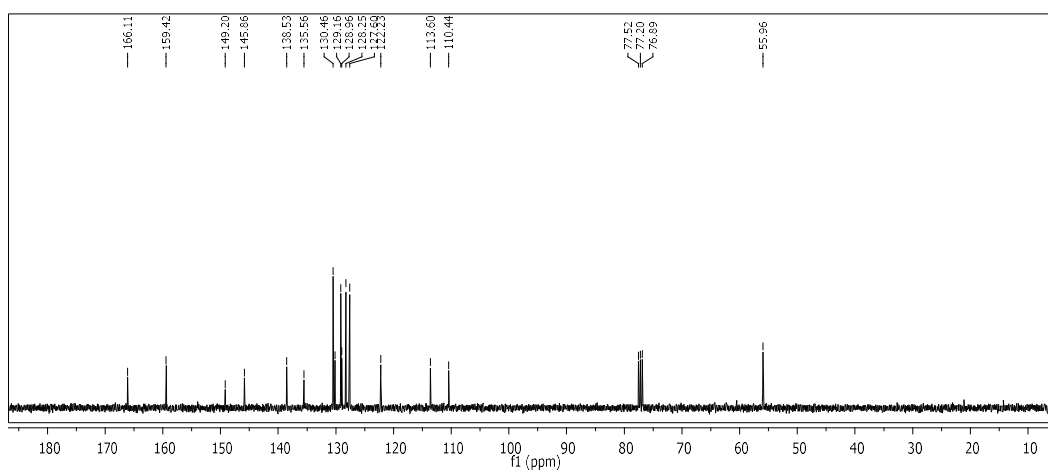

$^{13}\text{C}$  NMR of (*E*)-5-(((diphenylmethylene)hydrazineylidene)methyl)-2-methoxyphenol (**16**) in  $\text{CDCl}_3$

### User Spectra

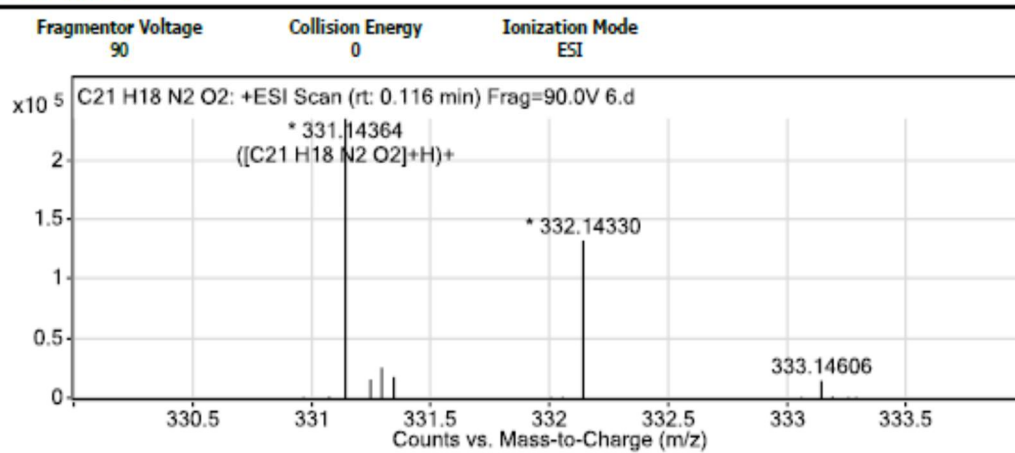

Mass spektrum of (*E*)-5-(((diphenylmethylene)hydrazineylidene)methyl)-2-methoxyphenol (**16**)

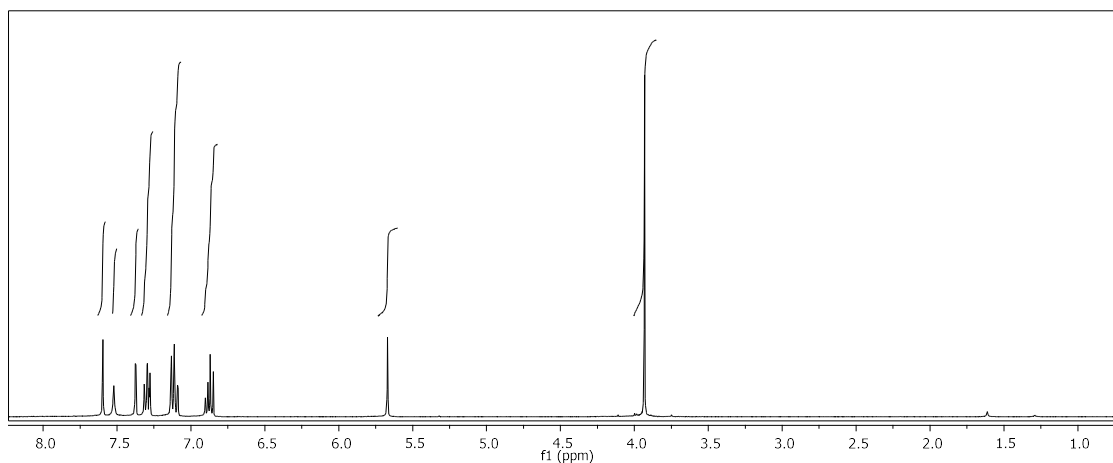

$^1\text{H}$  NMR of (*E*)-2-methoxy-5-((2-phenylhydrazineylidene)methyl)phenol (**17**) in  $\text{CDCl}_3$

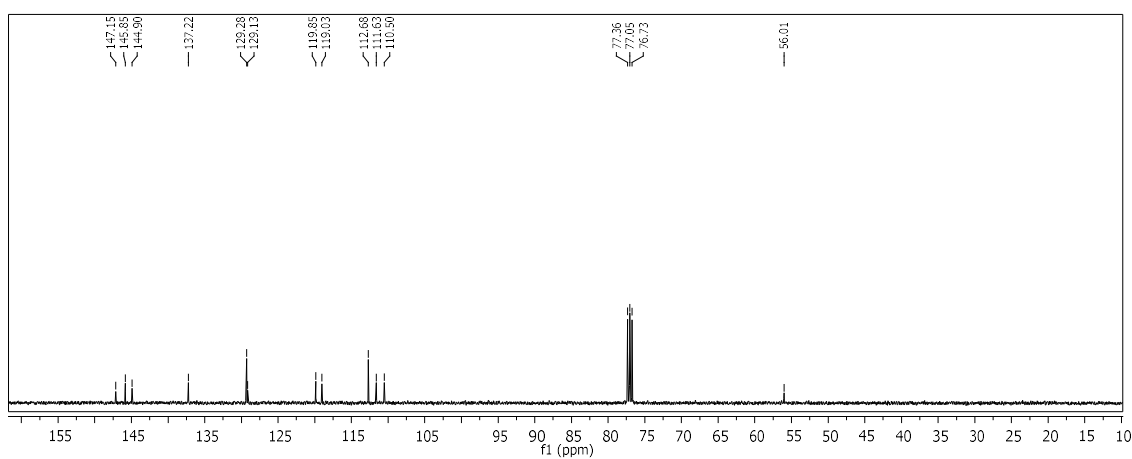

$^{13}\text{C}$  NMR of (*E*)-2-methoxy-5-((2-phenylhydrazineylidene)methyl)phenol (**17**) in  $\text{CDCl}_3$

### User Spectra

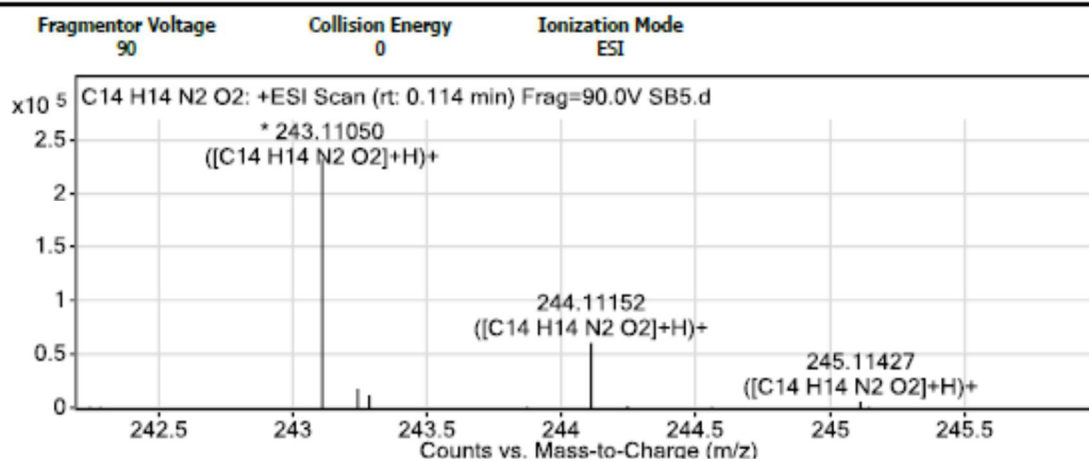

Mass spektrum of (*E*)-2-methoxy-5-((2-phenylhydrazineylidene)methyl)phenol (**17**)



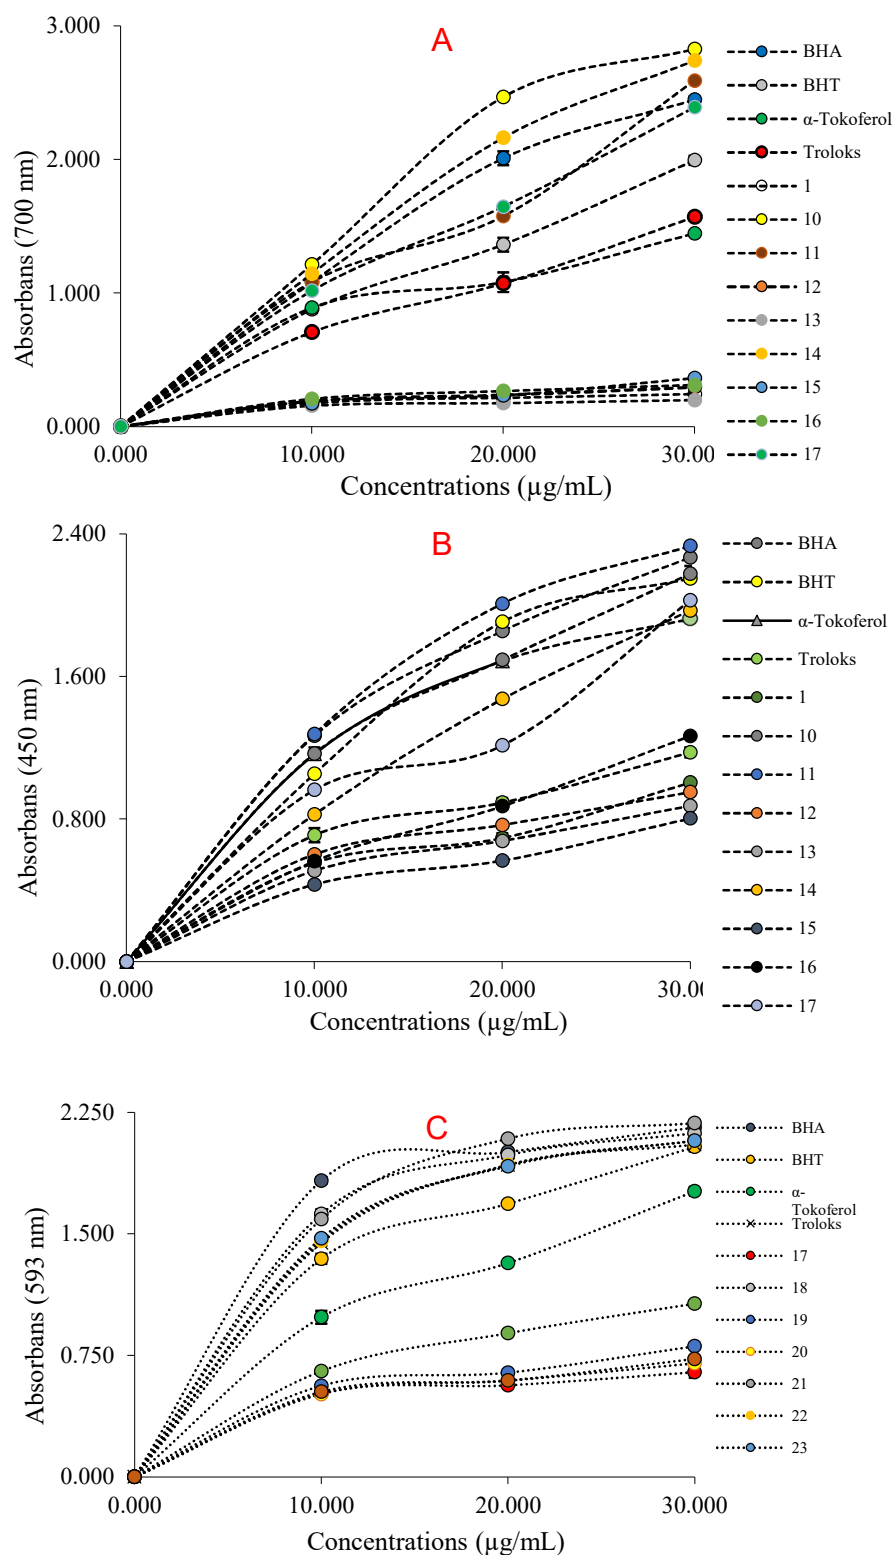

**Figure S1.** The reducing ability of 10-30  $\mu\text{g/mL}$  of Schiff bases (10-15) and hydrazineylidene derivatives (16-17) and standards. A.  $\text{Fe}^{3+}$  reducing effect, B.  $\text{Cu}^{2+}$  reducing effect, C.  $\text{Fe}^{3+}$ -TPTZ reducing effect

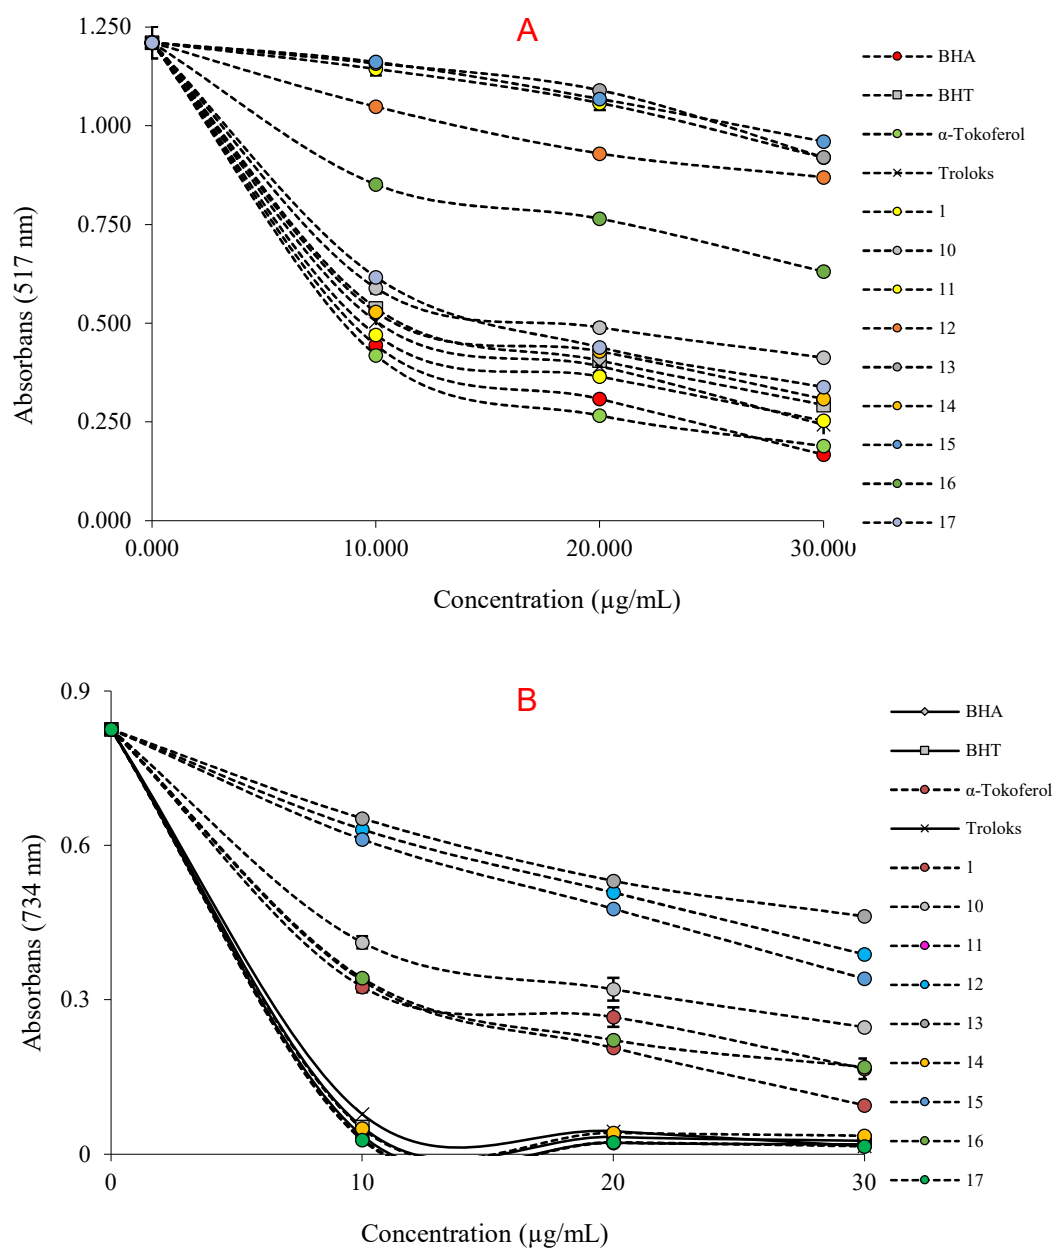

**Figure 2.** Radical removing abilities of different concentration (10-30 μg/mL) of Schiff bases (**10-15**) and hydrazineylidene derivatives (**16-17**) and standards. **A.** DPPH· removing effect, **B.** ABTS•+ removing effect
